1 **DREAM Interrupted: Severing MuvB from DREAM's pocket protein in**  
2 ***Caenorhabditis elegans* impairs gene repression but not DREAM chromatin**  
3 **assembly**

4  
5 Paul D. Goetsch<sup>\*,†,1</sup> and Susan Strome<sup>†</sup>

6  
7  
8 <sup>\*,1</sup>Department of Biological Sciences, Michigan Technological University, Houghton, MI  
9 49931

10 <sup>†</sup>Department of Molecular, Cell and Developmental Biology, University of California  
11 Santa Cruz, Santa Cruz, CA 95064

12

13

14

15

16

17

18

19

20

21

22

23

24 **Interrupting DREAM complex formation**

25

26 **Keywords**

27 DREAM, pocket protein, MuvB, CRISPR/Cas9 genome editing, transcriptional

28 repression

29

30 Corresponding author:

31 Paul D. Goetsch

32 740 Dow ESE building

33 1400 Townsend Drive

34 Houghton, MI 49931

35 Phone: 906-487-1790

36 Email: [pdgoetsc@mtu.edu](mailto:pdgoetsc@mtu.edu)

37

38

39

40

41

42

43

44

45

46

47 **Abstract**

48 The mammalian pocket protein family, which includes the Retinoblastoma protein (pRb)  
49 and Rb-like pocket proteins p107 and p130, regulates entry into and exit from the cell  
50 cycle by repressing cell cycle gene expression. Although pRb plays a dominant role in  
51 mammalian systems, p107 and p130 represent the ancestral pocket proteins. The Rb-  
52 like pocket proteins interact with the highly conserved 5-subunit MuvB complex and an  
53 E2F-DP transcription factor heterodimer, forming the DREAM (for Dp, Rb-like, E2F, and  
54 MuvB) complex. DREAM complex formation on chromatin culminates in direct  
55 repression of target genes mediated by the MuvB subcomplex. Here, we examined how  
56 the Rb-like pocket protein contributes to DREAM formation by disrupting the interaction  
57 between the sole *Caenorhabditis elegans* pocket protein LIN-35 and the MuvB subunit  
58 LIN-52 using CRISPR/Cas9 targeted mutagenesis. Disrupting the LIN-35-MuvB  
59 association did not affect DREAM chromatin occupancy but did cause a highly  
60 penetrant synthetic multivulval (SynMuv) phenotype, indicating that blocking DREAM  
61 assembly impairs MuvB function. Some DREAM target genes became derepressed,  
62 indicating that for those genes MuvB chromatin binding alone is not sufficient for gene  
63 repression and that direct LIN-35-MuvB association potentiates MuvB's innate  
64 repressive activity. In a previous study we showed that in worms lacking LIN-35, E2F-  
65 DP and MuvB chromatin occupancy is reduced genome-wide. With LIN-35 present, this  
66 study demonstrates that the E2F-DP-LIN-35 interaction promotes E2F-DP's chromatin  
67 localization, which we hypothesize supports MuvB chromatin occupancy indirectly  
68 through DNA. Altogether, this study highlights how the pocket protein family may recruit

69 regulatory factors like MuvB to chromatin through E2F-DP to facilitate their  
70 transcriptional activity.

## 71 **Introduction**

72       Members of the mammalian Retinoblastoma (Rb) protein family, pRb, p107, and  
73 p130, collectively called pocket proteins, serve key roles in regulating transcription  
74 during the cell cycle (CLASSON AND DYSON 2001; CLASSON AND HARLOW 2002; COBRINIK  
75 2005; BURKHART AND SAGE 2008; DICK AND RUBIN 2013). In mammalian cells, pRb  
76 interacts with activating E2F-DP transcription factor heterodimers (in mammals,  
77 E2F1/2/3-DP1/2), sequestering E2F-DP and preventing E2F-DP-mediated activation of  
78 early cell cycle genes (HELIN *et al.* 1992; LEES *et al.* 1993; LIBAN *et al.* 2016). In contrast,  
79 the Rb-like proteins p107 and p130 interact with repressive E2F-DPs (in mammals,  
80 E2F4/5-DP1/2) and a highly conserved 5-subunit MuvB subcomplex (in mammals,  
81 LIN9, LIN37, LIN52, LIN54, and RBAP48), forming the 8-subunit DREAM transcriptional  
82 repressor complex (KORENJAK *et al.* 2004; LEWIS *et al.* 2004; HARRISON *et al.* 2006;  
83 LITOVCHICK *et al.* 2007; SCHMIT *et al.* 2007). When associated with the DREAM complex,  
84 MuvB mediates transcriptional repression of early and late cell cycle genes (LITOVCHICK  
85 *et al.* 2007; GOETSCH *et al.* 2017; MULLER *et al.* 2017). DREAM functionally overlaps  
86 with pRb to repress cell cycle gene expression during cellular quiescence (G<sub>0</sub>)  
87 (HURFORD *et al.* 1997; LITOVCHICK *et al.* 2007; MULLER *et al.* 2017). Upon progression  
88 into the cell cycle, pRb and the Rb-like pocket proteins are phosphorylated by CDK4/6-  
89 cyclin D, releasing their respective interaction partners and triggering activation of cell  
90 cycle genes (TEDESCO *et al.* 2002; PILKINTON *et al.* 2007; BURKE *et al.* 2010). Thus, the  
91 association and dissociation of pocket proteins from their respective transcriptional

92 repressive complexes governs the switch between cell cycle quiescence and cell cycle  
93 progression.

94         The Rb-like homologs p130 and p107 represent the ancestral pocket proteins  
95 and likely the conserved components that mediate cell cycle control among eukaryotes  
96 (CAO *et al.* 2010; LIBAN *et al.* 2017). In *C. elegans*, LIN-35 is the sole pocket protein,  
97 most closely resembling p130/p107 (LU AND HORVITZ 1998). The pocket protein-  
98 associated complex MuvB was isolated in *Drosophila melanogaster* (KORENJAK *et al.*  
99 2004; LEWIS *et al.* 2004) and *Caenorhabditis elegans* (HARRISON *et al.* 2006) before  
100 homologs were identified in mammals (LITOVCHICK *et al.* 2007; PILKINTON *et al.* 2007;  
101 SCHMIT *et al.* 2007). The *C. elegans* complex, called DRM, regulates cell cycle genes  
102 and requires MuvB to mediate gene repression (BOXEM AND VAN DEN HEUVEL 2002;  
103 GOETSCH *et al.* 2017). DRM also regulates cell fate specification by antagonizing Ras  
104 signaling during vulval development (MYERS AND GREENWALD 2005; CUI *et al.* 2006;  
105 HARRISON *et al.* 2006) and by protecting somatic cells from expressing germline genes  
106 (WANG *et al.* 2005; PETRELLA *et al.* 2011).

107         Extensive biochemical analyses have demonstrated how the DREAM complex  
108 forms on chromatin (Figure 1A) (LITOVCHICK *et al.* 2007; PILKINTON *et al.* 2007; SCHMIT *et*  
109 *al.* 2007; GUILLEY *et al.* 2015). E2F-DP and LIN54, a MuvB component, direct site-  
110 specific chromatin localization (ZWICKER *et al.* 1995; SCHMIT *et al.* 2009; MULLER AND  
111 ENGELAND 2010; MULLER *et al.* 2012; MARCEAU *et al.* 2016). The Rb-like pocket protein  
112 serves as a bridge between the 2 DNA-binding DREAM components (GUILLEY *et al.*  
113 2015). The mammalian LIN52 protein interacts with the pocket protein via an “LxCxE  
114 motif” in LIN52. In mammals, the LxCxE motif is instead a suboptimal LxSxExL

115 sequence that is rendered optimal by phosphorylation of a nearby serine residue (S28)  
116 (GUILLEY *et al.* 2015) (Figure 1B). S28 phosphorylation by DYRK1A kinase induces  
117 formation of mammalian DREAM (LITOVCHICK *et al.* 2011). In *C. elegans*, the conserved  
118 *lin-52* gene encodes the optimal LxCxE sequence (Figure 1B). *C. elegans* lacks a  
119 DYRK1A homolog and its corresponding consensus motif RxSP in LIN-52 (Figure 1B),  
120 suggesting that in *C. elegans* a phospho-switch likely does not induce DRM formation  
121 (LITOVCHICK *et al.* 2011; GUILLEY *et al.* 2015). Importantly, the LxCxE binding motif  
122 mediates the high-affinity interaction that is employed by the human papillomavirus  
123 (HPV) viral oncoprotein E7 to disrupt association of LIN52 with mammalian pocket  
124 protein (GUILLEY *et al.* 2015).

125         Here, we assessed how the Rb-like pocket protein contributes to DREAM  
126 complex formation and function on chromatin. We previously reported that the absence  
127 of LIN-35 results in a genome-wide decrease in chromatin occupancy of both E2F-DP  
128 and MuvB, illustrating how DRM/DREAM disassembly likely proceeds during cell cycle  
129 progression (GOETSCH *et al.* 2017). The model of DREAM complex assembly centers on  
130 reintroduction of the pocket protein associations with E2F-DP and MuvB as cells finish  
131 the cell cycle. To test this model, we used CRISPR/Cas9-mediated genome editing of  
132 the *C. elegans* LIN-52 subunit of MuvB to sever the association of the pocket protein  
133 with the MuvB subcomplex. Disrupting the *C. elegans* LIN-35-MuvB association caused  
134 a highly penetrant synthetic multivulval (SynMuv) phenotype, indicating that DRM  
135 antagonization of Ras signaling in the developing vulva, and thus its transcription  
136 repressive activity, was impaired. Chromatin immunoprecipitation revealed that the  
137 chromatin association of E2F-DP-LIN-35 and MuvB was not impaired by loss of LIN-35-

138 MuvB association. Finally, transcript analyses revealed that only 2 of 10 tested target  
139 genes became derepressed, suggesting that direct LIN-35-MuvB association  
140 potentiates, but is not required for, MuvB-mediated transcriptional repression. Together,  
141 this study highlights how the scaffolding activity of the pocket proteins facilitates  
142 transcriptional repression of target genes.

## 143 **Materials and Methods**

### 144 **Worm strains**

145 Strains were cultured on Nematode Growth Medium (NGM) agarose plates with *E. coli*  
146 OP50 and incubated at 20°C. The following strains were used:

147 Wild type N2 (Bristol)

148 SS1240: *lin-52(bn132(lin-52p::TagRFP-T<sup>SEC</sup>3xFLAG::lin-52 3' UTR)) III /*

149 *hT2G [bli-4(e937) let-?(q782) qIs48] (I:III)*

150 SS1241: *lin-52(bn133(lin-52p::TagRFP-T::3xFLAG::lin-52 3' UTR)) III / hT2G [bli-*

151 *4(e937) let-?(q782) qIs48] (I:III)*

152 SS1325: *lin-52(bn138(lin-52::GFP<sup>SEC</sup>3xFLAG)) III*

153 SS1256: *lin-52(bn139(lin-52::GFP::3xFLAG)) III*

154 SS1273: *lin-52(bn150(lin-52[C44A]::GFP::3xFLAG)) III*

155 SS1276: *lin-52(bn151(lin-52[L42A,C44A,E46A]::GFP::3xFLAG)) III*

156 MT10591: *lin-8(n2731)*

157 MT1806: *lin-15A(n767)*

### 158 **CRISPR/Cas9-mediated genome editing**

159 For all genomic edits, 20 nucleotide crDNA targeting sequences were identified  
160 using the MIT CRISPR design tool (<http://crispr.mit.edu>). Single guide RNA sequences

161 were cloned into the PU6::unc119\_sgRNA vector (Addgene plasmid #46169) using the  
162 overlapping PCR fragment method described in (FRIEDLAND *et al.* 2013) or were cloned  
163 into pDD162 (Addgene plasmid #47549) using the Q5 Site Directed Mutagenesis Kit  
164 (New England Biolabs), as described in (DICKINSON *et al.* 2013). Homologous repair  
165 templates were cloned into pDD282 (Addgene plasmid #66823) or pDD284 (Addgene  
166 plasmid #66825) using Glibson Assembly (New England Biolabs) (GIBSON *et al.* 2009),  
167 as described in (DICKINSON *et al.* 2015). CRISPR/Cas9 component plasmids were co-  
168 injected with marker plasmids (FROKJAER-JENSEN *et al.* 2008) to identify strains with an  
169 extra-chromosomal array instead of a mutated endogenous gene. For targeted  
170 mutagenesis, *dpy-10(cn64)* sgRNA (pJA58, Addgene plasmid #59933), and *dpy-*  
171 *10(cn64)* ssDNA template, *dpy-10(cn64)* guide and ssDNA template were co-injected to  
172 select for positive CRISPR activity in injectant progeny, as described in (ARRIBERE *et al.*  
173 2014). Additional details are provided in Supplemental Materials and Methods.

## 174 **Microscopy**

175 L4 larvae were mounted on a 10% agarose pad and immobilized in a 1-2  $\mu$ L  
176 suspension of 0.1  $\mu$ m polystyrene beads (Polysciences), as described in (KIM *et al.*  
177 2013). Fluorescence images were acquired using a Solamere spinning-disk confocal  
178 system with  $\mu$ Manager software (EDELSTEIN *et al.* 2014). The microscope setup was as  
179 follows: Yokogawa CSUX-1 spinning disk scanner, Nikon TE2000-E inverted stand,  
180 Hamamatsu ImageEM X2 camera, solid state 405-, 488-, and 561-nm laser lines, 435-  
181 485, 500-550, and 573-613 fluorescent filters, and Nikon Plan Fluor 40x air objective.  
182 Images were processed using Image J (SCHNEIDER *et al.* 2012).

## 183 **C. elegans phenotype scoring**



184 For brood size analyses, L4 individuals were cloned to fresh plates every 24  
185 hours and all progeny were counted. For SynMuv phenotype scoring, 3 replicate plates  
186 per strain were set up with 5-10 adults that were allowed to lay eggs for 6 hours.  
187 Progeny were incubated at 20°C for 3 days, then scored for the presence or absence of  
188 pseudovulvae. The percentages of multivulva worms in each replicate population were  
189 averaged, and the standard deviation was calculated.

### 190 **Immunoblotting and co-immunoprecipitation (coIP)**

191 For immunoblotting whole worm lysates, 200 adults from each strain were picked  
192 into SDS gel-loading buffer (50 mM pH 6.8 Tris-Cl, 2% sodium dodecyl sulfate, 0.1%  
193 bromophenol blue, 100 mM  $\beta$ -mercaptoethanol). For coIP, embryos collected after  
194 bleaching gravid worms were aged for 3.5 hours and then frozen in liquid nitrogen, and  
195 lysates were prepared as described in (GOETSCH *et al.* 2017). For each IP, 8 mg of  
196 protein lysate was mixed with antibody-conjugated Dynabeads (ThermoFisher) and  
197 incubated for 2 hours at 4°C. Proteins were separated by SDS/PAGE, and western blot  
198 analysis was performed using a 1:1,000-1:5000 dilution of primary antibody and 1:2,000  
199 dilution of an appropriate HRP-conjugated secondary antibody. Serial western blot  
200 analysis was performed by stripping the blot with buffer containing 0.2M pH 2.2 glycine,  
201 0.1% SDS, and 1% Tween-20 between antibody probings. Additional details are  
202 provided in Supplemental Materials and Methods.

### 203 **Chromatin immunoprecipitation (ChIP) and sequential ChIP**

204 Embryos collected after bleaching gravid worms were aged for 3.5 hours and  
205 then frozen in liquid nitrogen. Lysates were prepared by grinding, crosslinking for 10  
206 minutes in 1% formaldehyde, and sonicating to an average size of 250 base pairs in FA

207 buffer (50 mM HEPES/KOH pH 7.5, 1 mM EDTA, 1% Triton X-100, 0.1% sodium  
208 deoxycholate, 150 mM NaCl) using a Bioruptor (Diagenode) on the high setting with 60  
209 rounds of 30 seconds on and 1 minute rest. Protein concentrations of lysates were  
210 determined using a Qubit fluorometer. ChIP and sequential ChIP experiments were  
211 performed as described in (GOETSCH *et al.* 2017) and in Supplemental Materials and  
212 Methods. Quantitative PCR was performed using SYBR green reagents on an Applied  
213 Biosystems ViiA 7 Real-Time PCR System (ThermoFisher).

#### 214 **Analysis of transcript levels by RT-qPCR**

215 Embryos collected after bleaching gravid worms were aged for 3.5 hours and  
216 then frozen in Trizol for RNA isolation. A total of 1  $\mu$ g RNA was treated with DNase and  
217 reverse transcribed using the High Capacity cDNA Kit (Applied Biosystems). qPCR was  
218 performed using SYBR green reagents on an Applied Biosystems ViiA 7 Real-Time  
219 PCR System (ThermoFisher). The relative quantity of experimental transcripts was  
220 calculated with *act-2* as the control gene using the  $\Delta$ Ct method.

#### 221 **Quantification and statistical analysis**

222 For brood size analysis, significance was determined using a Wilcoxon-Mann-  
223 Whitney test comparing CRISPR/Cas9-genome edited strains to wild type (N2). For  
224 ChIP-qPCR and transcript level analysis by RT-qPCR, significance was determined  
225 using a student's t-test between *lin-52(WT)* and *lin-52(1A)* and *lin-52(3A)* transgenic  
226 strains.

#### 227 **Data and reagent availability**

228 Requests for information, strains, and reagents should be directed to and will be  
229 fulfilled by Paul D. Goetsch ([pdgoetsc@mtu.edu](mailto:pdgoetsc@mtu.edu)). Primers used for cloning, ChIP-

230 qPCR, and RT-qPCR are available in Supplemental Table S1. All data necessary for  
231 confirming the conclusions present are represented fully within the article. Supplemental  
232 material is available at FigShare: XXX

## 233 **Results**

### 234 **Targeted mutagenesis to disrupt DREAM complex formation**

235 Structural studies previously demonstrated that MuvB interacts with the pocket  
236 protein via the LIN52 subunit (Figure 1A) (GUILLEY *et al.* 2015). Using the self-excising  
237 cassette (SEC) method for *C. elegans* CRISPR/Cas9 genome editing (DICKINSON *et al.*  
238 2015), we generated a *lin-52(KO)* strain (*lin52(bn133[lin-52p::TagRFP-T::3xFLAG])* by  
239 completely replacing the *lin-52* gene with *TagRFP-T* coding sequence (Figure 2A). We  
240 observed that *lin-52(KO)* rendered worms sterile (Figure 2C), as previously observed in  
241 the *lin-52(n3718)* protein null strain (CEOL *et al.* 2006; HARRISON *et al.* 2006). This  
242 resembles loss of other MuvB components, as loss of LIN-9, LIN-53 (*C. elegans*  
243 RBAP48), or LIN-54 in protein null strains also renders worms sterile and affects the  
244 levels of other MuvB subunits, suggesting that MuvB components require co-expression  
245 for assembly/stability of the complex (HARRISON *et al.* 2006). Loss of LIN-37 does not  
246 cause sterility and does not affect assembly of the rest of MuvB in either *C. elegans* or  
247 mammalian cells (HARRISON *et al.* 2006; MAGES *et al.* 2017). We next replaced the  
248 *TagRFP-T* coding sequence with *lin-52* tagged with a C-terminal *GFP-3xFLAG* coding  
249 sequence, generating the *lin-52(WT)* strain (*lin-52(bn139[lin-52::GFP::3xFLAG])*, Figure  
250 2A). We observed that *lin-52(WT)* completely rescued fertility (Figure 2C), indicating  
251 that the GFP tag does not disrupt LIN-52 function.

252           Since LIN-52 is essential for *C. elegans* fertility, we sought to disrupt the LIN-35-  
253 LIN-52 interaction without affecting protein integrity. We directed targeted mutagenesis  
254 of the LIN-52 LxCxE sequence (Figure 1B) using CRISPR/Cas9-mediated genomic  
255 editing. We generated 2 mutants of the LxCxE binding motif in *lin-52(WT)* using the *dpy-*  
256 *10* co-CRISPR method of small oligo homology-directed repair (ARRIBERE *et al.* 2014).  
257 We generated the *lin-52(1A)* single-alanine mutation strain (*lin-52(bn150[lin-*  
258 *52[C44A]::GFP::3xFLAG)*) and the *lin-52(3A)* triple-alanine mutation strain (*lin-*  
259 *52(bn151[lin-52[L42A,C44A,E46A]::GFP::3xFLAG)*) (Figure 2B) with the intent to  
260 completely disrupt LIN-52's interaction with the *C. elegans* pocket protein LIN-35.  
261 Additional silent mutations were included in the oligo repair templates to generate new  
262 restriction enzyme cut sites to aid in genotyping (Figure 2B).

263           Full loss of *C. elegans* DREAM activity causes sterility, as observed in protein  
264 null mutants of worm E2F-DP (*dpl-1* and *efl-1*) and worm MuvB (*lin-9*, *lin-52*, *lin-53*, and  
265 *lin-54*) (BEITEL *et al.* 2000; CHI AND REINKE 2006; TABUCHI *et al.* 2011). Since the C-  
266 terminally GFP-tagged *lin-52* coding sequence completely rescued *lin-52(KO)* sterility,  
267 we were able to test whether *lin-52(1A)* and *lin-52(3A)* disrupt DREAM function. We  
268 observed that neither the 1A nor 3A mutation in the LIN-52 LxCxE sequence caused a  
269 significant reduction in brood size (Figure 2C). Using western blot analysis of selected  
270 DREAM components from *lin-52(WT)* and mutant lysates, we observed that DREAM  
271 component protein levels were unaffected compared to wild type (N2) (Figure 2D,  
272 Figure S1). Similarly, using live image analysis of *lin-52(WT)*, *lin-52(1A)*, and *lin-52(3A)*  
273 L4 larvae, we observed that LIN-52 level and localization appeared normal in mutants  
274 (Figure 2A). Together, these results demonstrate that mutation of the LIN-52 LxCxE

275 sequence does not cause a *lin-52* null phenotype and does not alter the levels and  
276 tissue distribution of MuvB components.

277 **Blocking DREAM complex formation causes the classic SynMuv mutant**  
278 **phenotype**

279 *C. elegans* DREAM components were initially identified in genetic screens for a  
280 Synthetic Multivulval (SynMuv) phenotype (LU AND HORVITZ 1998; CEOL AND HORVITZ  
281 2001; CEOL *et al.* 2006; HARRISON *et al.* 2006). All 8 components of DREAM were  
282 classified as SynMuv B genes; double mutant worms bearing a mutation in a SynMuv B  
283 gene along with a mutation in a SynMuv A gene have multiple vulvae along their ventral  
284 body instead of the usual single vulva (FAY AND YOCHER 2007). We hypothesized that if  
285 DREAM function was affected by mutation of LIN-52's LxCxE sequence, then pairing  
286 our 1A and 3A LIN-52 mutations with a SynMuv A mutation should cause a SynMuv  
287 phenotype. When paired with SynMuv A allele *lin-8(n2731)* (HARRISON *et al.* 2007) or  
288 *lin-15A(n767)* (HUANG *et al.* 1994), *lin-52(3A)* but not with *lin-52(1A)* resulted in a  
289 SynMuv phenotype (Figure 3A). These results indicate that the 3A substitution in LxCxE  
290 impairs DREAM function.

291 To test whether the 3A substitution in fact impairs pocket protein-MuvB  
292 association, we performed co-immunoprecipitations (co-IPs) from protein extracts  
293 prepared from *lin-52(WT)*, *lin-52(1A)*, and *lin-52(3A)* late embryos. We pulled down LIN-  
294 35 and tested for LIN-52 association using the GFP epitope, and we pulled down LIN-52  
295 using either the GFP or FLAG epitope and tested for LIN-35 association (Figure 3B,  
296 Figure S2). In both co-IP experiments, we observed that LIN-52 association with LIN-35  
297 was lost in *lin-52(3A)* extracts but not in *lin-52(1A)* extracts. These results demonstrate

298 that the LIN-52 3A substitution successfully severed the protein-protein association  
299 between LIN-52 and LIN-35, effectively blocking formation of an intact DREAM  
300 complex.

301 **E2F-DP-LIN-35 and MuvB subcomplexes independently co-occupy chromatin**  
302 **sites**

303 In the absence of LIN-35, E2F-DP and MuvB do not associate with one another  
304 and their chromatin occupancy is reduced genome-wide (GOETSCH *et al.* 2017). In our  
305 *lin-52(3A)* worm strain, LIN-35 is present, but its association with MuvB is severed. We  
306 tested the impact of this severing on the chromatin localization of DREAM components  
307 using chromatin immunoprecipitation (ChIP). We chose 4 genes, *set-21*, *mis-12*, *polh-1*,  
308 and *air-1*, as representative DREAM target genes; in *lin-35* null embryos, the chromatin  
309 occupancy of DREAM components was greatly diminished at each of their gene  
310 promoters and was undetectable at the *air-1* promoter (GOETSCH *et al.* 2017). We  
311 observed that all tested DREAM components remained similarly enriched at the 4  
312 selected promoters in *lin-52(3A)* as compared to *lin-52(WT)* (Figure 4A). An additional 6  
313 DREAM target gene promoters were tested and showed similar DREAM occupancy  
314 profiles (Figure S3A). The DREAM components tested included E2F-DP (DPL-1 and  
315 EFL-1) and LIN-35, suggesting that the chromatin association of the repressive E2F-DP  
316 transcription factor heterodimer is stabilized by its interaction with the pocket protein.

317 To test whether MuvB and E2F-DP-LIN-35 co-occupy DREAM target regions, we  
318 performed sequential ChIP analysis. We first ChIPed LIN-52 via its FLAG tag and then  
319 ChIPed LIN-35. We observed no significant difference in LIN-35 co-occupancy in *lin-*  
320 *52(3A)* extracts versus *lin-52(WT)* extracts (Figure 4B). Our results indicate that,

321 although the interaction of LIN-35 and MuvB is disrupted, DREAM components  
322 nevertheless co-localize at target promoters through their respective protein-DNA  
323 interactions.

### 324 **Severing the LIN-35-MuvB connection impairs transcriptional repression of some** 325 **but not all DREAM target genes**

326 MuvB dissociation from E2F-DP-LIN-35 resulted in no observed decline in  
327 chromatin occupancy of DREAM at the 10 gene promoters tested (Figure 4A, Figure  
328 S3A). Each of the gene products targeted by the 4 selected promoter regions in Figure  
329 4A was upregulated in the *lin-35* null strain (KIRIENKO AND FAY 2007; GOETSCH *et al.*  
330 2017). We performed gene expression analysis of these 4 genes in *lin-52(WT)*, *lin-*  
331 *52(1A)*, and *lin-52(3A)* late embryos using RT-qPCR (Figure 4C). We observed that 2  
332 genes, *set-21* and *polh-1*, were significantly upregulated in both *lin-52* mutant strains,  
333 while 2 genes, *mis-12* and *air-1*, were not up-regulated. Transcript levels of the gene  
334 products targeted by the 6 selected promoter regions in Figure S3A were not affected  
335 (Figure S3B). Importantly, in the *lin-35* null strain, DREAM was dissociated from the *air-*  
336 *1* promoter and *air-1* was upregulated (GOETSCH *et al.* 2017). In our study, DREAM (with  
337 a severed LIN-35-LIN-52 connection) was associated with the *air-1* promoter and *air-1*  
338 was not upregulated. Thus, MuvB chromatin occupancy is necessary but not sufficient  
339 for repression of DREAM target genes.

### 340 **Discussion**

341 The trio of pocket proteins, pRb, p107, and p130, govern cell cycle exit and  
342 reentry through targeted transcriptional repression of cell cycle genes. We analyzed  
343 how the sole *C. elegans* Rb-like pocket protein LIN-35 contributes to the formation and

344 function of the DREAM complex, which relies on the recruitment of the highly conserved  
345 and essential 5-subunit MuvB complex to direct repression of target genes. Using  
346 CRISPR/Cas9-mediated targeted mutagenesis, we generated a mutant *C. elegans*  
347 strain in which MuvB's LIN-35-interacting subunit LIN-52 was rendered incapable of  
348 interacting with LIN-35. Blocking DREAM assembly in worms impaired DREAM  
349 function, causing the classic SynMuv phenotype and upregulation of some DREAM  
350 target genes. However, even though LIN-35 and MuvB association was abolished, all of  
351 the DREAM components tested showed unimpaired association with chromatin. Thus,  
352 our findings reveal that the LIN-35-MuvB association potentiates MuvB-mediated  
353 transcriptional repression but is not required.

354 Our analysis provides important insight into how assembly of the mammalian  
355 DREAM complex establishes repression of cell cycle genes. DREAM assembly is  
356 triggered by DYRK1A phosphorylation of LIN52, initiating MuvB association with  
357 p107/p130 (LITOVCHICK *et al.* 2011; GUILLEY *et al.* 2015). Mammalian MuvB's function  
358 switches between transcriptional repression in the DREAM complex during quiescence  
359 and transcriptional activation after associating with the B-Myb transcription factor and  
360 forming the Myb-MuvB (MMB) complex during the late cell cycle (LEWIS *et al.* 2004;  
361 OSTERLOH *et al.* 2007; SCHMIT *et al.* 2007; KNIGHT *et al.* 2009; SADASIVAM *et al.* 2012).  
362 DYRK1A-mediated LIN52 phosphorylation also inhibits MuvB association with B-Myb  
363 (LITOVCHICK *et al.* 2011), even though the 2 interaction interfaces are not exclusive  
364 (GUILLEY *et al.* 2018). Our data demonstrate that MuvB localizes to chromatin sites and  
365 represses gene targets without direct association with the pocket protein. Thus, we



366 propose that the pocket protein's primary role in DREAM complex assembly is to protect  
367 MuvB's function as a transcriptional repressor.

368         The delicate switch between MuvB-associated cell cycle gene repression and  
369 activation is hijacked in cancer cells. All 3 mammalian pocket proteins are inactivated by  
370 the E7 viral oncoprotein present in high-risk human papillomavirus (HPV) (ZHANG *et al.*  
371 2006; HUH *et al.* 2007). E7 interacts with the mammalian pocket proteins through the  
372 high-affinity LxCxE binding motif, disrupting MuvB association in DREAM (GUILLEY *et al.*  
373 2015). HPV E7 concurrently coaxes MuvB into its transcriptional activator function by  
374 stimulating MMB assembly (PANG *et al.* 2014). However, cancer cells resist cytotoxic  
375 chemotherapy by temporarily exiting the cell cycle (BOICHUK *et al.* 2013), suggesting  
376 that MuvB's capacity for transcriptional repression is retained. Based on our findings  
377 that MuvB does not require direct association with the pocket protein to target gene  
378 repression, we propose that MuvB's function in cancer cells requires closer scrutiny.

379         We previously observed that E2F-DP and MuvB chromatin association is  
380 severely affected by loss of LIN-35 (GOETSCH *et al.* 2017). By severing LIN-35-MuvB  
381 association, this study reveals that LIN-35 directly stabilizes E2F-DP chromatin  
382 occupancy. However, we also observed that MuvB chromatin occupancy is not impaired  
383 even though MuvB no longer associates directly with E2F-DP-LIN-35. Importantly, *in*  
384 *vitro* analysis of heterodimeric mammalian E2F-DP complex DNA binding  
385 characteristics identified a distinct induction of DNA bending, especially in the case of  
386 the homologues of *C. elegans* EFL-1-DPL-1 (E2F4-DP1/2) (TAO *et al.* 1997). We  
387 propose that DREAM-associated E2F-DP heterodimers promote MuvB co-occupancy  
388 through a DNA bending-dependent mechanism. Together, our results suggest a model

389 in which the LIN-35 pocket protein promotes E2F-DP chromatin occupancy, which in  
390 turn promotes MuvB chromatin occupancy.

391 Our results support an exciting model for how local E2F-DP-mediated alterations  
392 to DNA shape enhanced by their interaction with a pocket protein promote MuvB co-  
393 occupancy. Even with evolutionary divergence from the ancestral pocket protein, this  
394 model may also apply to pRb function. Many histone deacetylases and chromatin  
395 remodeling complexes associate with pRb through the LxCxE binding cleft, although  
396 many of these associations have only limited support thus far from  
397 structural/biochemical interaction studies (DYSON 2016). Variation in pRb  
398 monophosphorylation events that can alter pRb structure and recognition of binding  
399 partners offer one explanation for how pRb can potentially interact with >300 individual  
400 protein partners (RUBIN 2013; NARASIMHA *et al.* 2014). Our data provide an alternative,  
401 but not exclusive, possibility, namely that direct and stable pRb association with these  
402 myriad protein partners may be unnecessary. Perhaps pRb association with a few  
403 partners such as E2F-DPs promotes localization of multi-protein complexes to genomic  
404 sites. Additional dissection of DREAM and pRb structure and function will shed light on  
405 how the pocket proteins mediate their essential cellular roles.

#### 406 **Acknowledgments**

407 We thank Seth Rubin and members of the Rubin and Strome labs for helpful  
408 discussions. Some strains were provided by the Caenorhabditis Genetics Center, which  
409 is funded by the NIH Office of Research Infrastructure Programs (P40 OD010440). This  
410 work was supported by National Institutes of Health R01 grant GM34069 to S.S. and  
411 American Cancer Society Postdoctoral Fellowship PF-16-106-01-DDC to P.D.G.

412 **Figure 1**

413

414 **A**

415

416

417

418

419

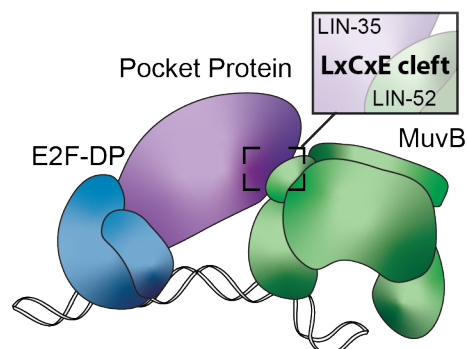

420

421

422

423

424

**B**

Pocket Protein interaction interface

|                          |     |         |       |          |        |
|--------------------------|-----|---------|-------|----------|--------|
|                          | 15  | 20      | 25    | 30       | 35     |
| <i>H. sapiens</i> LIN52  | EAS | LLSFEKL | D     | RASP     | DLWPEQ |
|                          | 40  | 45      | 50    | 55       |        |
| <i>C. elegans</i> LIN-52 | KKM | LECTE   | TMPEE | SEPVPMKC |        |

425 **Figure 1 Model of DREAM complex formation**

426 (A) Model of the *C. elegans* DREAM complex bound to DNA: E2F-DP (blue), the pocket  
 427 protein LIN-35 (purple), and the 5-subunit MuvB subcomplex (green). The highlighted  
 428 region shows the target region for this study: an LxCxE binding motif in the MuvB  
 429 subunit LIN-52 that interacts directly with the LIN-35 pocket protein.

430 (B) Alignment of *H. sapiens* LIN52 and *C. elegans* LIN-52 sequences. The human  
 431 LxSxExL and worm LxCxE sequences are highlighted in yellow, and the human  
 432 DYRK1A consensus phosphorylation sequence is highlighted in orange. Arrows indicate  
 433 residues involved in the interaction with the pocket protein.

434

435 **Figure 2**

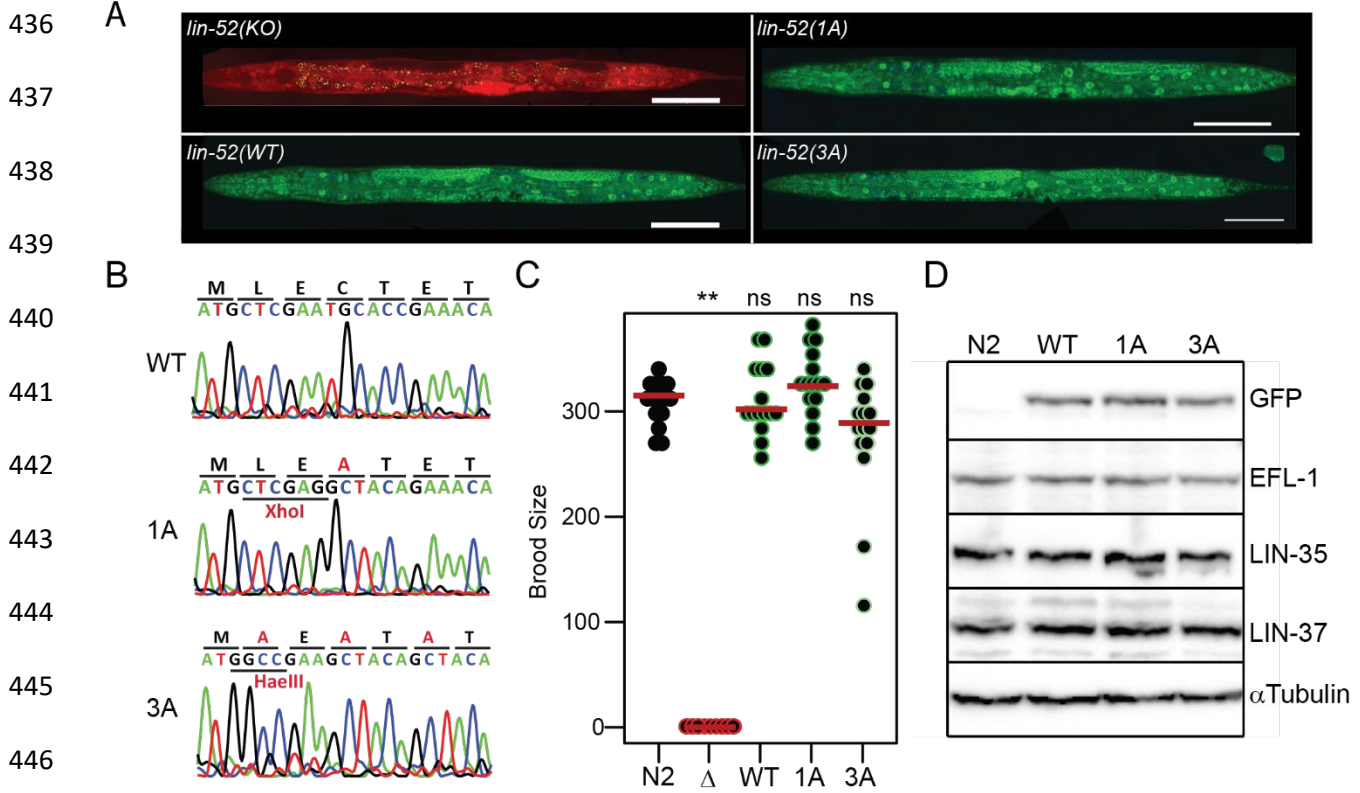

447 **Figure 2 Targeted mutagenesis to disrupt DREAM complex formation**

448 (A) Live worm fluorescence images of *lin-52(KO)*, *lin-52(WT)*, *lin-52(1A)*, and *lin-52(3A)*  
 449 L4 larvae. Composites were artificially straightened. Scale bar, 100μM.

450 (B) Sanger sequencing of the *lin-52* LxCxE coding region in *lin-52(WT)*, *lin-52(1A)*, and  
 451 *lin-52(3A)*.

452 (C) Strip chart of the brood sizes of wild-type (N2) worms and *lin-52(KO)*, *lin-52(WT)*,  
 453 *lin-52(1A)*, and *lin-52(3A)* transgenic worms. Significance (\*\* p-value < 0.01) was  
 454 determined by a Wilcoxon-Mann-Whitney test comparing the indicated strains to wild  
 455 type (N2).

456 (D) Western blot analysis of DREAM subunits LIN-52 (via GFP tag), EFL-1, LIN-35, and  
 457 LIN-37 using lysates from wild-type (N2) worms and *lin-52(WT)*, *lin-52(1A)*, and *lin-*

458 52(3A) transgenic worms separated by SDS/PAGE. Antibodies used are indicated on  
459 the right. Alpha-tubulin was used as a loading control. Full blots are shown in Figure S1.

460

461

462

463

464

465

466

467

468

469

470

471

472

473

474

475

476

477

478

479

480

481 **Figure 3**

482

A

483

484

485

|    | <i>lin-8(n2731)</i> | <i>lin-15A(n767)</i> |
|----|---------------------|----------------------|
| WT | 0±0 (382)           | 0±0 (505)            |
| 1A | 0±0 (211)           | 0±0 (422)            |
| 3A | 99.3±0.6 (301)      | 96.5±0.2 (375)       |

486

B

487

488

489

490

491

492

493

494

495

496

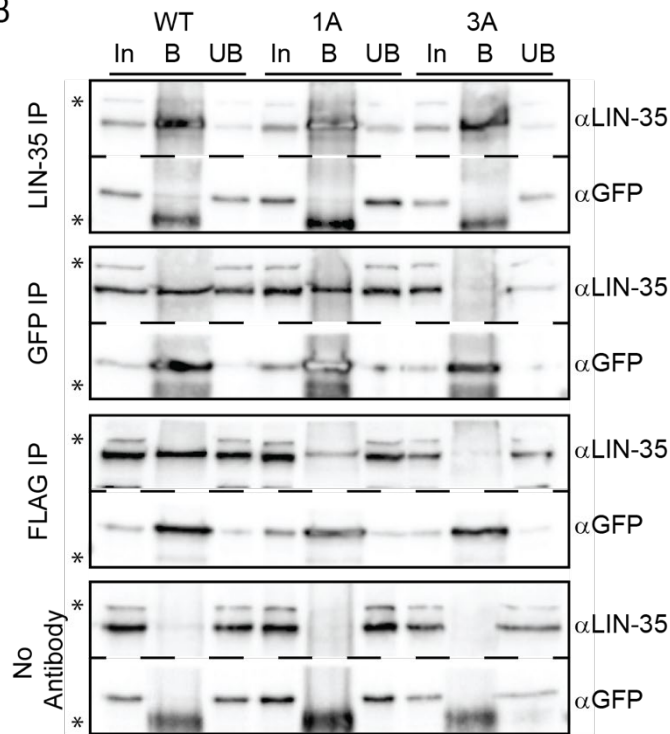

497 **Figure 3 Blocking DREAM complex formation recapitulates the classic SynMuv**

498 **phenotype**

499 (A) Table indicating the percentage Synthetic Multivulval (SynMuv) of *lin-52(WT)*, *lin-*

500 *52(1A)*, and *lin-52(3A)* in combination with SynMuv A mutant alleles *lin-8(n2731)* or *lin-*

501 *15A(n767)* with standard deviation indicated. The population size (n) is indicated in

502 parentheses.

503 (B) Late embryo extracts from *lin-52(WT)*, *lin-52(1A)*, and *lin-52(3A)* (each tagged with  
504 GFP and FLAG) were immunoprecipitated with anti-LIN-35, anti-GFP, and anti-FLAG  
505 antibodies, with no antibody serving as a negative control. Proteins bound (B) and  
506 unbound (UB) were separated by SDS/PAGE, and western blot analysis was performed  
507 using the antibodies indicated on the right. 5% of Input (In) is shown on the left.  
508 Asterisks indicate non-specific bands. Full blots are shown in Figure S2.

509

510

511

512

513

514

515

516

517

518

519

520

521

522

523

524

525

526 **Figure 4**

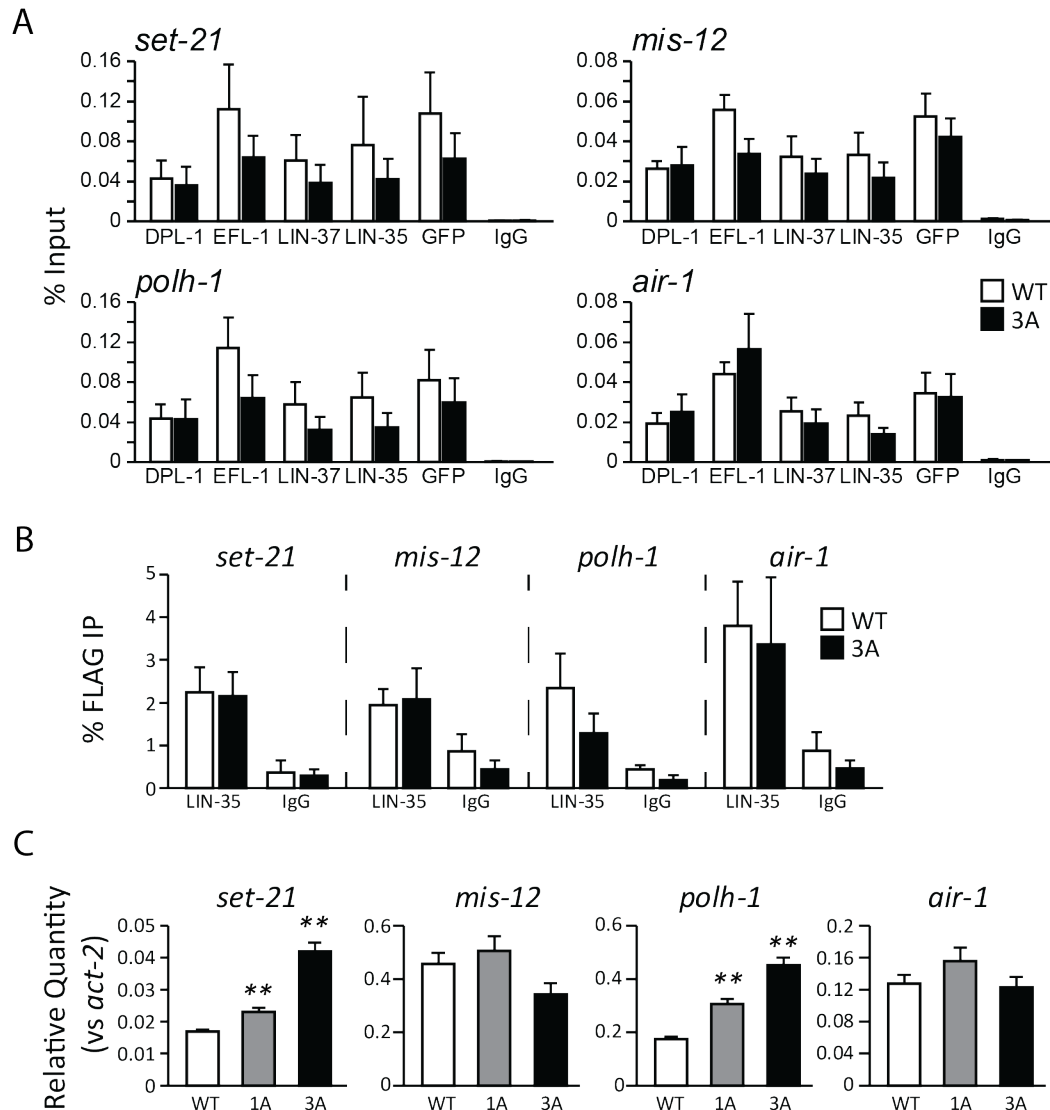

527

528 **Figure 4 Analysis of chromatin association with and repression of DREAM target**

529 **genes**

530 (A) ChIP-qPCR of 5 DREAM subunits DPL-1, EFL-1, LIN-37, LIN-35, and LIN-52 (via  
531 GFP tag) from *lin-52(WT)* (white) and *lin-52(3A)* (black) late embryo extracts at 4

532 DREAM target genes. IgG was used as a negative control. Signals are presented as

533 percentage of Input DNA. Error bars indicate standard error of the mean. Additional

534 target genes are shown in Figure S3.



535 (B) Sequential ChIP-qPCR of LIN-52 (via FLAG tag) followed by LIN-35 or IgG from *lin-*  
536 *52(WT)* (white) and *lin-52(3A)* (black) late embryo extracts at 4 DREAM target genes.  
537 Signals are presented as percentage of FLAG IP DNA. Error bars indicate standard  
538 error of the mean.

539 (C) RT-qPCR analysis comparing transcript levels of 4 DREAM target genes in *lin-*  
540 *52(WT)* (white) *lin-52(1A)* (grey), and *lin-52(3A)* (black) late embryos. Expression values  
541 from 2 independent experiments each consisting of 4 biological replicates were  
542 averaged and are presented as the relative quantity (Rq) compared to *act-2*. Error bars  
543 indicate standard error of the mean, and significance was determined by a student's T-  
544 test between transcript levels in mutant (3A or 1A) vs WT (\*\* p-value < 0.01). Additional  
545 target genes are shown in Figure S3.

546

547

548

549

550

551

552

553

554

555

556

557

## 558 **References**

- 559 Arribere, J. A., R. T. Bell, B. X. Fu, K. L. Artiles, P. S. Hartman *et al.*, 2014 Efficient marker-  
560 free recovery of custom genetic modifications with CRISPR/Cas9 in  
561 *Caenorhabditis elegans*. *Genetics* 198: 837-846.
- 562 Beitel, G. J., E. J. Lambie and H. R. Horvitz, 2000 The *C. elegans* gene *lin-9*, which acts  
563 in an Rb-related pathway, is required for gonadal sheath cell development and  
564 encodes a novel protein. *Gene* 254: 253-263.
- 565 Boichuk, S., J. A. Parry, K. R. Makielski, L. Litovchick, J. L. Baron *et al.*, 2013 The DREAM  
566 complex mediates GIST cell quiescence and is a novel therapeutic target to  
567 enhance imatinib-induced apoptosis. *Cancer Res* 73: 5120-5129.
- 568 Boxem, M., and S. van den Heuvel, 2002 *C. elegans* class B synthetic multivulva genes  
569 act in G(1) regulation. *Curr Biol* 12: 906-911.
- 570 Burke, J. R., A. J. Deshong, J. G. Pelton and S. M. Rubin, 2010 Phosphorylation-induced  
571 conformational changes in the retinoblastoma protein inhibit E2F transactivation  
572 domain binding. *J Biol Chem* 285: 16286-16293.
- 573 Burkhart, D. L., and J. Sage, 2008 Cellular mechanisms of tumour suppression by the  
574 retinoblastoma gene. *Nat Rev Cancer* 8: 671-682.
- 575 Cao, L., B. Peng, L. Yao, X. Zhang, K. Sun *et al.*, 2010 The ancient function of RB-E2F  
576 pathway: insights from its evolutionary history. *Biol Direct* 5: 55.
- 577 Ceol, C. J., and H. R. Horvitz, 2001 *dpl-1* DP and *efl-1* E2F act with *lin-35* Rb to  
578 antagonize Ras signaling in *C. elegans* vulval development. *Mol Cell* 7: 461-473.

- 579 Ceol, C. J., F. Stegmeier, M. M. Harrison and H. R. Horvitz, 2006 Identification and  
580 classification of genes that act antagonistically to let-60 Ras signaling in  
581 *Caenorhabditis elegans* vulval development. *Genetics* 173: 709-726.
- 582 Chi, W., and V. Reinke, 2006 Promotion of oogenesis and embryogenesis in the *C.*  
583 *elegans* gonad by EFL-1/DPL-1 (E2F) does not require LIN-35 (pRB).  
584 *Development* 133: 3147-3157.
- 585 Classon, M., and N. Dyson, 2001 p107 and p130: versatile proteins with interesting  
586 pockets. *Exp Cell Res* 264: 135-147.
- 587 Classon, M., and E. Harlow, 2002 The retinoblastoma tumour suppressor in development  
588 and cancer. *Nat Rev Cancer* 2: 910-917.
- 589 Cobrinik, D., 2005 Pocket proteins and cell cycle control. *Oncogene* 24: 2796-2809.
- 590 Cui, M., J. Chen, T. R. Myers, B. J. Hwang, P. W. Sternberg *et al.*, 2006 SynMuv genes  
591 redundantly inhibit lin-3/EGF expression to prevent inappropriate vulval induction  
592 in *C. elegans*. *Dev Cell* 10: 667-672.
- 593 Dick, F. A., and S. M. Rubin, 2013 Molecular mechanisms underlying RB protein function.  
594 *Nat Rev Mol Cell Biol* 14: 297-306.
- 595 Dickinson, D. J., A. M. Pani, J. K. Heppert, C. D. Higgins and B. Goldstein, 2015  
596 Streamlined Genome Engineering with a Self-Excising Drug Selection Cassette.  
597 *Genetics* 200: 1035-1049.
- 598 Dickinson, D. J., J. D. Ward, D. J. Reiner and B. Goldstein, 2013 Engineering the  
599 *Caenorhabditis elegans* genome using Cas9-triggered homologous  
600 recombination. *Nat Methods* 10: 1028-1034.

- 601 Dyson, N. J., 2016 RB1: a prototype tumor suppressor and an enigma. *Genes Dev* 30:  
602 1492-1502.
- 603 Edelstein, A. D., M. A. Tsuchida, N. Amodaj, H. Pinkard, R. D. Vale *et al.*, 2014 Advanced  
604 methods of microscope control using muManager software. *J Biol Methods* 1.
- 605 Fay, D. S., and J. Yochem, 2007 The SynMuv genes of *Caenorhabditis elegans* in vulval  
606 development and beyond. *Dev Biol* 306: 1-9.
- 607 Friedland, A. E., Y. B. Tzur, K. M. Esvelt, M. P. Colaiacovo, G. M. Church *et al.*, 2013  
608 Heritable genome editing in *C. elegans* via a CRISPR-Cas9 system. *Nat Methods*  
609 10: 741-743.
- 610 Frokjaer-Jensen, C., M. W. Davis, C. E. Hopkins, B. J. Newman, J. M. Thummel *et al.*,  
611 2008 Single-copy insertion of transgenes in *Caenorhabditis elegans*. *Nat Genet*  
612 40: 1375-1383.
- 613 Gibson, D. G., L. Young, R. Y. Chuang, J. C. Venter, C. A. Hutchison, 3rd *et al.*, 2009  
614 Enzymatic assembly of DNA molecules up to several hundred kilobases. *Nat*  
615 *Methods* 6: 343-345.
- 616 Goetsch, P. D., J. M. Garrigues and S. Strome, 2017 Loss of the *Caenorhabditis elegans*  
617 pocket protein LIN-35 reveals MuvB's innate function as the repressor of DREAM  
618 target genes. *PLoS Genet* 13: e1007088.
- 619 Guiley, K. Z., A. N. Iness, S. Saini, S. Tripathi, J. S. Lipsick *et al.*, 2018 Structural  
620 mechanism of Myb-MuvB assembly. *Proc Natl Acad Sci U S A* 115: 10016-10021.
- 621 Guiley, K. Z., T. J. Liban, J. G. Felthousen, P. Ramanan, L. Litovchick *et al.*, 2015  
622 Structural mechanisms of DREAM complex assembly and regulation. *Genes Dev*  
623 29: 961-974.

- 624 Harrison, M. M., C. J. Ceol, X. Lu and H. R. Horvitz, 2006 Some *C. elegans* class B  
625 synthetic multivulva proteins encode a conserved LIN-35 Rb-containing complex  
626 distinct from a NuRD-like complex. *Proc Natl Acad Sci U S A* 103: 16782-16787.
- 627 Harrison, M. M., X. Lu and H. R. Horvitz, 2007 LIN-61, one of two *Caenorhabditis elegans*  
628 malignant-brain-tumor-repeat-containing proteins, acts with the DRM and NuRD-  
629 like protein complexes in vulval development but not in certain other biological  
630 processes. *Genetics* 176: 255-271.
- 631 Helin, K., J. A. Lees, M. Vidal, N. Dyson, E. Harlow *et al.*, 1992 A cDNA encoding a pRB-  
632 binding protein with properties of the transcription factor E2F. *Cell* 70: 337-350.
- 633 Huang, L. S., P. Tzou and P. W. Sternberg, 1994 The *lin-15* locus encodes two negative  
634 regulators of *Caenorhabditis elegans* vulval development. *Mol Biol Cell* 5: 395-  
635 411.
- 636 Huh, K., X. Zhou, H. Hayakawa, J. Y. Cho, T. A. Libermann *et al.*, 2007 Human  
637 papillomavirus type 16 E7 oncoprotein associates with the cullin 2 ubiquitin ligase  
638 complex, which contributes to degradation of the retinoblastoma tumor  
639 suppressor. *J Virol* 81: 9737-9747.
- 640 Hurford, R. K., Jr., D. Cobrinik, M. H. Lee and N. Dyson, 1997 pRB and p107/p130 are  
641 required for the regulated expression of different sets of E2F responsive genes.  
642 *Genes Dev* 11: 1447-1463.
- 643 Kim, E., L. Sun, C. V. Gabel and C. Fang-Yen, 2013 Long-term imaging of *Caenorhabditis*  
644 *elegans* using nanoparticle-mediated immobilization. *PLoS One* 8: e53419.
- 645 Kirienko, N. V., and D. S. Fay, 2007 Transcriptome profiling of the *C. elegans* Rb ortholog  
646 reveals diverse developmental roles. *Dev Biol* 305: 674-684.

- 647 Knight, A. S., M. Notaridou and R. J. Watson, 2009 A Lin-9 complex is recruited by B-  
648 Myb to activate transcription of G2/M genes in undifferentiated embryonal  
649 carcinoma cells. *Oncogene* 28: 1737-1747.
- 650 Korenjak, M., B. Taylor-Harding, U. K. Binne, J. S. Satterlee, O. Stevaux *et al.*, 2004  
651 Native E2F/RBF complexes contain Myb-interacting proteins and repress  
652 transcription of developmentally controlled E2F target genes. *Cell* 119: 181-193.
- 653 Lees, J. A., M. Saito, M. Vidal, M. Valentine, T. Look *et al.*, 1993 The retinoblastoma  
654 protein binds to a family of E2F transcription factors. *Mol Cell Biol* 13: 7813-7825.
- 655 Lewis, P. W., E. L. Beall, T. C. Fleischer, D. Georgette, A. J. Link *et al.*, 2004 Identification  
656 of a *Drosophila* Myb-E2F2/RBF transcriptional repressor complex. *Genes Dev* 18:  
657 2929-2940.
- 658 Liban, T. J., E. M. Medina, S. Tripathi, S. Sengupta, R. W. Henry *et al.*, 2017 Conservation  
659 and divergence of C-terminal domain structure in the retinoblastoma protein family.  
660 *Proc Natl Acad Sci U S A* 114: 4942-4947.
- 661 Liban, T. J., M. J. Thwaites, F. A. Dick and S. M. Rubin, 2016 Structural Conservation  
662 and E2F Binding Specificity within the Retinoblastoma Pocket Protein Family. *J*  
663 *Mol Biol* 428: 3960-3971.
- 664 Litovchick, L., L. A. Florens, S. K. Swanson, M. P. Washburn and J. A. DeCaprio, 2011  
665 DYRK1A protein kinase promotes quiescence and senescence through DREAM  
666 complex assembly. *Genes Dev* 25: 801-813.
- 667 Litovchick, L., S. Sadasivam, L. Florens, X. Zhu, S. K. Swanson *et al.*, 2007 Evolutionarily  
668 conserved multisubunit RBL2/p130 and E2F4 protein complex represses human  
669 cell cycle-dependent genes in quiescence. *Mol Cell* 26: 539-551.

- 670 Lu, X., and H. R. Horvitz, 1998 *lin-35* and *lin-53*, two genes that antagonize a *C. elegans*  
671 Ras pathway, encode proteins similar to Rb and its binding protein RbAp48. *Cell*  
672 95: 981-991.
- 673 Mages, C. F., A. Wintsche, S. H. Bernhart and G. A. Muller, 2017 The DREAM complex  
674 through its subunit Lin37 cooperates with Rb to initiate quiescence. *Elife* 6.
- 675 Marceau, A. H., J. G. Felthousen, P. D. Goetsch, A. N. Iness, H. W. Lee *et al.*, 2016  
676 Structural basis for LIN54 recognition of CHR elements in cell cycle-regulated  
677 promoters. *Nat Commun* 7: 12301.
- 678 Muller, G. A., and K. Engeland, 2010 The central role of CDE/CHR promoter elements in  
679 the regulation of cell cycle-dependent gene transcription. *FEBS J* 277: 877-893.
- 680 Muller, G. A., M. Quaas, M. Schumann, E. Krause, M. Padi *et al.*, 2012 The CHR promoter  
681 element controls cell cycle-dependent gene transcription and binds the DREAM  
682 and MMB complexes. *Nucleic Acids Res* 40: 1561-1578.
- 683 Muller, G. A., K. Stangner, T. Schmitt, A. Wintsche and K. Engeland, 2017 Timing of  
684 transcription during the cell cycle: Protein complexes binding to E2F, E2F/CLE,  
685 CDE/CHR, or CHR promoter elements define early and late cell cycle gene  
686 expression. *Oncotarget* 8: 97736-97748.
- 687 Myers, T. R., and I. Greenwald, 2005 *lin-35* Rb acts in the major hypodermis to oppose  
688 ras-mediated vulval induction in *C. elegans*. *Dev Cell* 8: 117-123.
- 689 Narasimha, A. M., M. Kaulich, G. S. Shapiro, Y. J. Choi, P. Sicinski *et al.*, 2014 Cyclin D  
690 activates the Rb tumor suppressor by mono-phosphorylation. *Elife* 3.

- 691 Osterloh, L., B. von Eyss, F. Schmit, L. Rein, D. Hubner *et al.*, 2007 The human synMuv-  
692 like protein LIN-9 is required for transcription of G2/M genes and for entry into  
693 mitosis. *EMBO J* 26: 144-157.
- 694 Pang, C. L., S. Y. Toh, P. He, S. Teissier, Y. Ben Khalifa *et al.*, 2014 A functional  
695 interaction of E7 with B-Myb-MuvB complex promotes acute cooperative  
696 transcriptional activation of both S- and M-phase genes. (129 c). *Oncogene* 33:  
697 4039-4049.
- 698 Petrella, L. N., W. Wang, C. A. Spike, A. Rechtsteiner, V. Reinke *et al.*, 2011 synMuv B  
699 proteins antagonize germline fate in the intestine and ensure *C. elegans* survival.  
700 *Development* 138: 1069-1079.
- 701 Pilkinton, M., R. Sandoval and O. R. Colamonici, 2007 Mammalian Mip/LIN-9 interacts  
702 with either the p107, p130/E2F4 repressor complex or B-Myb in a cell cycle-phase-  
703 dependent context distinct from the *Drosophila* dREAM complex. *Oncogene* 26:  
704 7535-7543.
- 705 Rubin, S. M., 2013 Deciphering the retinoblastoma protein phosphorylation code. *Trends*  
706 *Biochem Sci* 38: 12-19.
- 707 Sadasivam, S., S. Duan and J. A. DeCaprio, 2012 The MuvB complex sequentially  
708 recruits B-Myb and FoxM1 to promote mitotic gene expression. *Genes Dev* 26:  
709 474-489.
- 710 Schmit, F., S. Cremer and S. Gaubatz, 2009 LIN54 is an essential core subunit of the  
711 DREAM/LINC complex that binds to the *cdc2* promoter in a sequence-specific  
712 manner. *FEBS J* 276: 5703-5716.



713 Schmit, F., M. Korenjak, M. Mannefeld, K. Schmitt, C. Franke *et al.*, 2007 LINC, a human  
714 complex that is related to pRB-containing complexes in invertebrates regulates the  
715 expression of G2/M genes. *Cell Cycle* 6: 1903-1913.

716 Schneider, C. A., W. S. Rasband and K. W. Eliceiri, 2012 NIH Image to ImageJ: 25 years  
717 of image analysis. *Nat Methods* 9: 671-675.

718 Tabuchi, T. M., B. Deplancke, N. Osato, L. J. Zhu, M. I. Barrasa *et al.*, 2011 Chromosome-  
719 biased binding and gene regulation by the *Caenorhabditis elegans* DRM complex.  
720 *PLoS Genet* 7: e1002074.

721 Tao, Y., R. F. Kassatly, W. D. Cress and J. M. Horowitz, 1997 Subunit composition  
722 determines E2F DNA-binding site specificity. *Mol Cell Biol* 17: 6994-7007.

723 Tedesco, D., J. Lukas and S. I. Reed, 2002 The pRb-related protein p130 is regulated by  
724 phosphorylation-dependent proteolysis via the protein-ubiquitin ligase SCF(Skp2).  
725 *Genes Dev* 16: 2946-2957.

726 Wang, D., S. Kennedy, D. Conte, Jr., J. K. Kim, H. W. Gabel *et al.*, 2005 Somatic  
727 misexpression of germline P granules and enhanced RNA interference in  
728 retinoblastoma pathway mutants. *Nature* 436: 593-597.

729 Zhang, B., W. Chen and A. Roman, 2006 The E7 proteins of low- and high-risk human  
730 papillomaviruses share the ability to target the pRB family member p130 for  
731 degradation. *Proc Natl Acad Sci U S A* 103: 437-442.

732 Zwicker, J., F. C. Lucibello, L. A. Wolfrain, C. Gross, M. Truss *et al.*, 1995 Cell cycle  
733 regulation of the cyclin A, *cdc25C* and *cdc2* genes is based on a common  
734 mechanism of transcriptional repression. *EMBO J* 14: 4514-4522.

735

## **Supplemental Information**

### **DREAM Interrupted: Severing MuvB from DREAM's pocket protein in *Caenorhabditis elegans* impairs gene repression but not DREAM chromatin assembly**

Paul D. Goetsch and Susan Strome

## Supplemental Materials and Methods:

### CRISPR/Cas9-mediated genome editing

To generate *lin-52*(KO), 2 Cas9 target sites were identified near the 5' and 3' ends of the *lin-52* gene. Single guide RNA sequences were cloned into the PU6::unc119\_sgRNA vector. The *lin-52* KO homologous repair template was generated by amplifying homology arms containing the *lin-52* promoter and *lin-52* 3' UTR and cloned into the N-terminal tag digested pDD284 vector. The following injection mix was microinjected into the germline of ~50 N2 young adults: 50 ng /  $\mu$ L Cas9 expression plasmid (pDD162, Addgene #47549), 2.5 ng /  $\mu$ L *Pmyo-2::mCherry::unc-54utr* (pCJF90, Addgene #19327), 5 ng /  $\mu$ L *Pmyo-3::mCherry::unc-54utr* (pCFJ104, Addgene #19328), 10 ng /  $\mu$ L *Prab-3::mCherry::unc-54utr* (pGH8, Addgene #19359), 50 ng /  $\mu$ L *lin-52* 5' sgRNA (pPDG14), 50 ng /  $\mu$ L *lin-52* 3' sgRNA (pPDG18), and 10 ng  $\mu$ L *Plin-52::TagRFP-T^SEC^3xFLAG::lin-52utr* (pPDG13). CRISPR/Cas9-positive progeny were treated with hygromycin and screened for the Roller phenotype and absence of fluorescent co-injection marker expression (the latter enables extrachromosomal arrays to be distinguished from edited endogenous genes). Individuals from 1 positive selection plate were selected and balanced to create the strain SS1240 *lin-52*(*bn132*(*lin-52p::TagRFP-T^SEC^3xFLAG::lin-52 3' UTR*)) III / *hT2G* [*bli-4*(*e937*) *let-?(q782) qIs48*] (*I:III*). The self-excising cassette (SEC) was removed by a 4-5 hour heat-shock of L1 larvae at 32°C. Non-Roller F1 progeny were isolated to create the strain SS1241 *lin-52*(*bn133*(*lin-52p::TagRFP-T::3xFLAG::lin-52 3' UTR*)) III / *hT2G* [*bli-4*(*e937*) *let-?(q782) qIs48*] (*I:III*).

To generate *lin-52(WT)*, 2 Cas9 target sites were identified near the 5' and 3' ends of the *TagRFP-T-3xFLAG* coding sequence. Single guide RNA sequences were cloned into pDD162. The *lin-52* WT homologous repair template was generated by amplifying homology arms containing the *lin-52* promoter with the gene's coding sequence and the *lin-52* 3' UTR and cloned into the C-terminal tag digested pDD282 vector. The following CRISPR/Cas9 and co-injection marker plasmid mix was microinjected into the germline of ~50 SS1241 young adults: 50 ng /  $\mu$ L *TagRFP-T* 5' sgRNA-Cas9 vector (pPDG21), 50 ng /  $\mu$ L *TagRFP-T* 3' sgRNA-Cas9 vector (pPDG22), 2.5 ng /  $\mu$ L pCJF90, 5 ng /  $\mu$ L pCFJ104, and 10 ng /  $\mu$ L *Plin-52::lin-52 CDS-GFP^SEC^3xFLAG::lin-52utr* (pPDG17). CRISPR/Cas9-positive progeny were treated with hygromycin and screened for the Roller phenotype and absence of fluorescent co-injection marker expression. Individuals from 2 of 3 positive selection plates were selected and made homozygous to create strains SS1325 and SS1326 *lin-52(bn138(lin-52::GFP^SEC^3xFLAG)) III*. The SEC was removed by heat-shock, and non-Roller F1 progeny were isolated to create the strains SS1256 and SS1257 *lin-52(bn139(lin-52::GFP::3xFLAG)) III*. SS1256 was backcrossed 6 times to generate strain SS1272, which was used in downstream experiments.

To generate *lin-52(1A)* and *lin-52(3A)*, 1 Cas9 target site was identified near the LxCxE coding sequence and cloned into the pDD162 vector. Single strand DNA templates included at least 40 base pairs of homology flanking the LxCxE coding sequence and silent mutations to aid in genotyping, as illustrated in Figure 2B. The following/Cas9 and co-injection marker plasmid mix was microinjected into the germline of 6 (for 1A) and 10 (for 3A) SS1256 young adults: 40 ng /  $\mu$ L *lin-52* LxCxE sgRNA-

Cas9 vector (pPDG59), 2.5 ng /  $\mu$ L pCJF90, 5 ng /  $\mu$ L pCFJ104, 20 ng /  $\mu$ L *lin-52* mutagenesis ssDNA template (1A or 3A), 40 ng /  $\mu$ L *dpy-10(cn64)* sgRNA (pJA58, Addgene plasmid #59933), and *dpy-10(cn64)* ssDNA template. *dpy-10(cn64)* guide and ssDNA template were co-injected to select for positive CRISPR activity in injectant progeny. Injected adults were cloned onto individual plates, and F1 progeny were screened for presence of a Roller (Rol) and/or Dumpy (Dpy) phenotype. Individual Rol and/or Dpy progeny were genotyped, resulting in 3 independent *lin-52(1A)* and 2 independent *lin-52(3A)* strains. Each strain was backcrossed 6 times to create SS1273-SS1275 *lin-52(bn150(lin-52[C44A]::GFP::3xFLAG)) III*, and SS1276 and SS1277 *lin-52(bn151(lin-52[L42A,C44A,E46A]::GFP::3xFLAG)) III*. SS1273 and SS1276 were used in downstream experiments.

### **Immunoblotting and co-immunoprecipitation (coIP)**

CoIP lysates were prepared by grinding frozen embryos using a mortar and pestle, resuspending in lysis buffer (25 mM HEPES pH 7.6, 150 mM NaCl, 1mM DTT, 1mM EDTA, 0.5 mM EGTA, 0.1% Nonidet P-40, 10% glycerol) with Complete EDTA-free Protease Inhibitors (Roche), and sonicating twice for 30 seconds. Lysates were clarified and precleared using a mix of Protein A and Protein G Dynabeads (ThermoFisher). Protein concentrations of coIP lysates were determined using a Qubit fluorometer (ThermoFisher). For each IP, 5  $\mu$ g of anti-FLAG was crosslinked to Protein G Dynabeads and 2  $\mu$ g of anti-GFP or anti-LIN-35 was crosslinked to Protein A Dynabeads using dimethyl pimelimidate in 0.2 M trimethylamine pH 8.2. Crosslinking was stopped using 0.1M Tris pH 8.0, and beads were washed with 0.1 M glycine pH 2.8 before being stored in phosphate buffered saline pH 7.2 with 0.05% Tween-20. Each IP

was washed with lysis buffer, and eluted with 50  $\mu$ L 2x SDS gel-loading buffer for 5 minutes at 98°C

### **Chromatin immunoprecipitation (ChIP) and sequential ChIP**

For ChIP, chromatin extracts were precleared with Protein A Dynabeads. ChIPs were performed with 2 mg of extract and 1  $\mu$ g of antibody, with 2% of the extract set aside for an input reference control. ChIPs were incubated overnight at 4°C with 1% sarkosyl. Protein A Dynabeads equilibrated in 20  $\mu$ L FA buffer were added and incubated for 2 hours at 4°C. ChIPs were washed with the following buffers: once with FA buffer containing 1 M NaCl, once with FA buffer containing 0.5 M NaCl, once with TEL buffer (10 mM Tris-HCl pH 8.0, 0.25 M LiCl, 1% NP-40, 1% sodium deoxycholate, 1 mM EDTA), and twice with TE buffer (10 mM Tris-HCl pH 8.0 and 1 mM EDTA). 2 elutions of 50  $\mu$ L elution buffer containing TE plus 1% SDS and 250 mM NaCl were incubated at 55°C. Eluted ChIP and input samples were incubated with proteinase K for 1 hour at 55°C. Crosslinks were reversed overnight at 65°C. DNA was purified by phenol-chloroform extraction and ethanol precipitation using glycogen as a carrier.

For sequential ChIP, chromatin extracts were precleared with Protein G Dynabeads and 4 parallel ChIPs per replicate were performed with 2.5 mg of extract and 2.5  $\mu$ g of anti-FLAG antibody, with 2% of the extract set aside for an input reference control. ChIPs were incubated overnight at 4°C with 1% sarkosyl. Protein G Dynabeads equilibrated in 20  $\mu$ L FA buffer were added and incubated for 2 hours at 4°C. ChIPs for each replicate were washed as described above and pooled. 2 elutions of 50  $\mu$ L 0.1M NaHCO<sub>3</sub> plus 1% SDS were incubated at 55°C for 15 minutes. Elutions were divided, diluted with FA buffer with 1% sarkosyl, and incubated with anti-LIN-35 or IgG as a

negative control, with 10% of the elution set aside as a reference control. The 2<sup>nd</sup> ChIP was incubated overnight at 4°C. Protein A Dynabeads equilibrated in 20 µL FA buffer were added and incubated for 2 hours at 4°C. ChIPs were washed and eluted twice with 50 µL elution buffer with incubation at 55°C. Eluted ChIP, reference, and input samples were incubated with proteinase K for 1 hour at 55°C. Crosslinks were reversed overnight at 65°C. DNA was purified by phenol-chloroform extraction and ethanol precipitation using glycogen as a carrier.

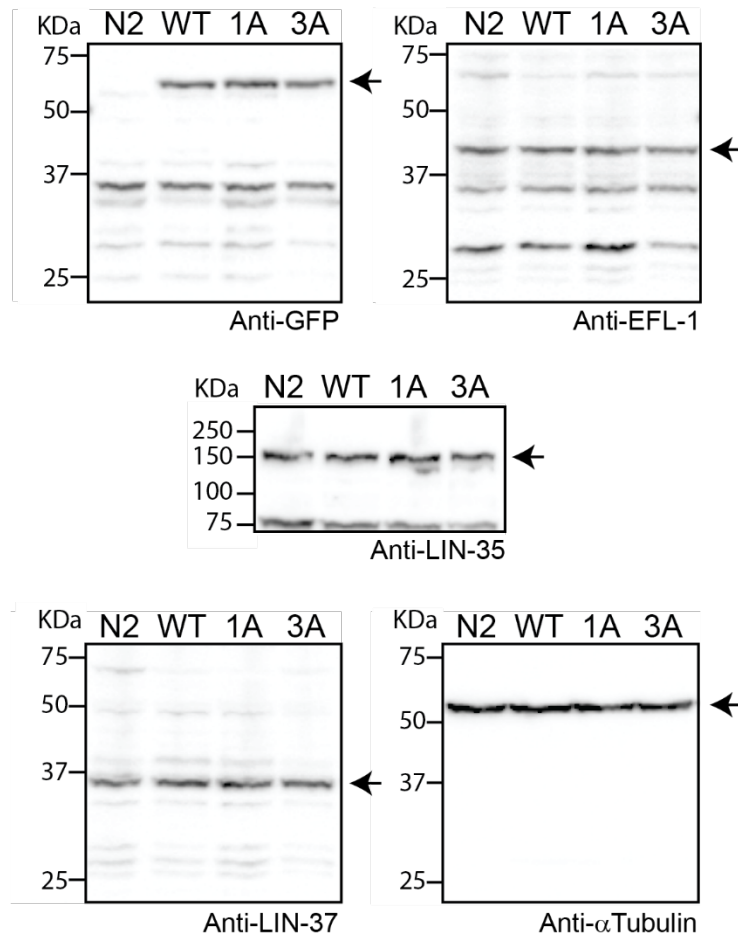

### Figure S1

Full western blots of DREAM subunits LIN-52 (via GFP tag), EFL-1, LIN-35, and LIN-37 using whole worm lysates from Bristol (N2), *lin-52(WT)*, *lin-52(1A)*, and *lin-52(3A)* separated by SDS/PAGE. Antibodies used are indicated below each blot. Alpha-tubulin was used as a loading control. Membranes were cut at the 75 kDa band. Arrows indicate blot regions presented in Figure 2D.



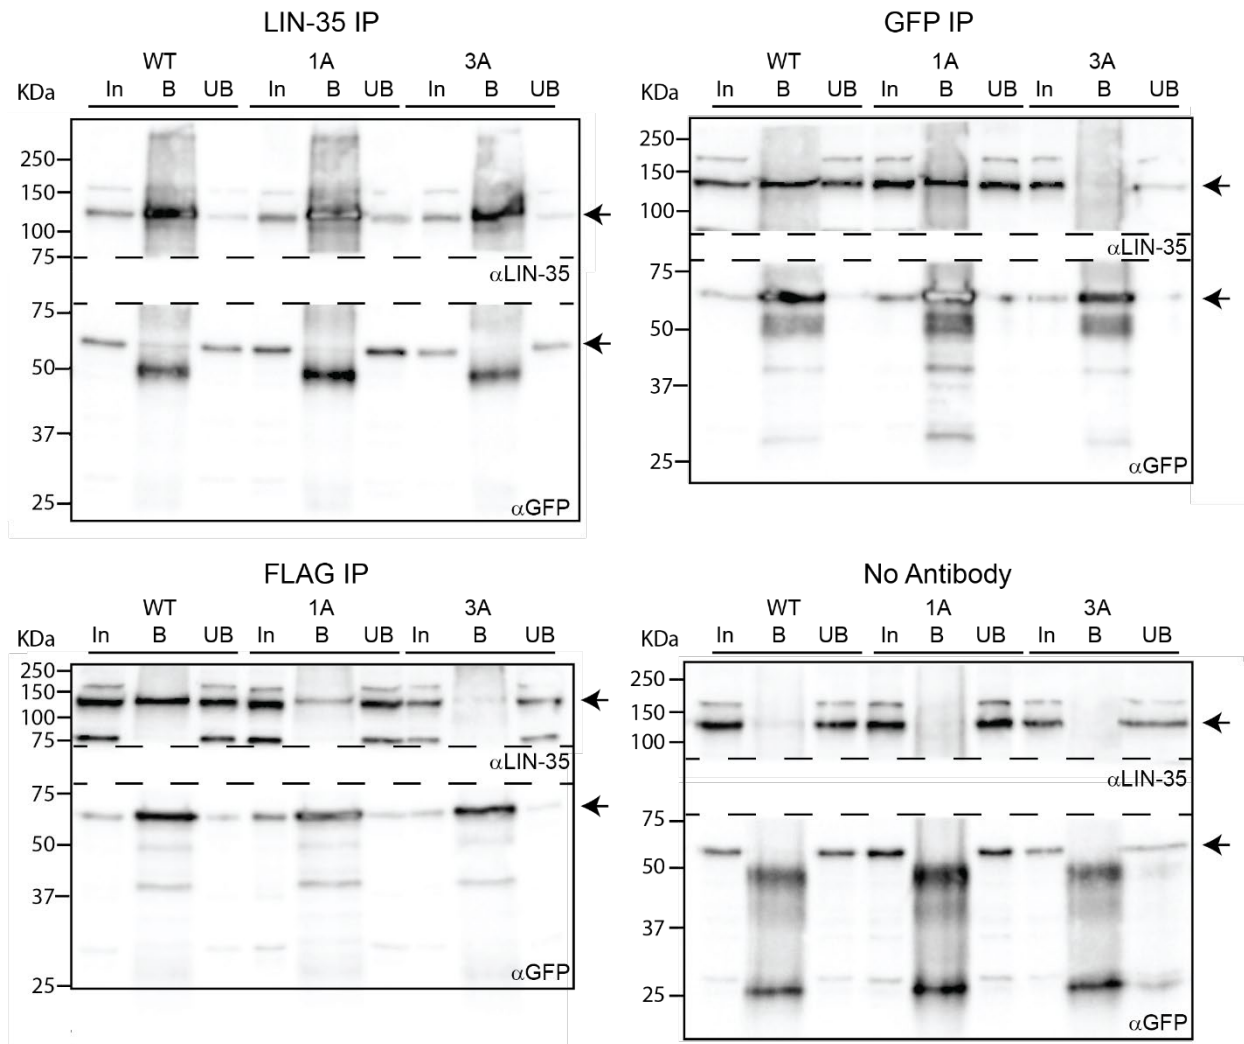

## Figure S2

Full western blots of late embryo extracts from *lin-52(WT)*, *lin-52(1A)*, and *lin-52(3A)* that were immunoprecipitated with anti-LIN-35, anti-GFP, and anti-FLAG antibodies, with no antibody serving as a negative control. Proteins bound (B) and unbound (UB) were separated by SDS/PAGE and transferred to PVDF membranes that were cut at the 75 kDa band (indicated by dashed line). Antibodies used are indicated below each blot. 5% of Input (In) was included. Arrows indicate blot regions presented in Figure 3B.

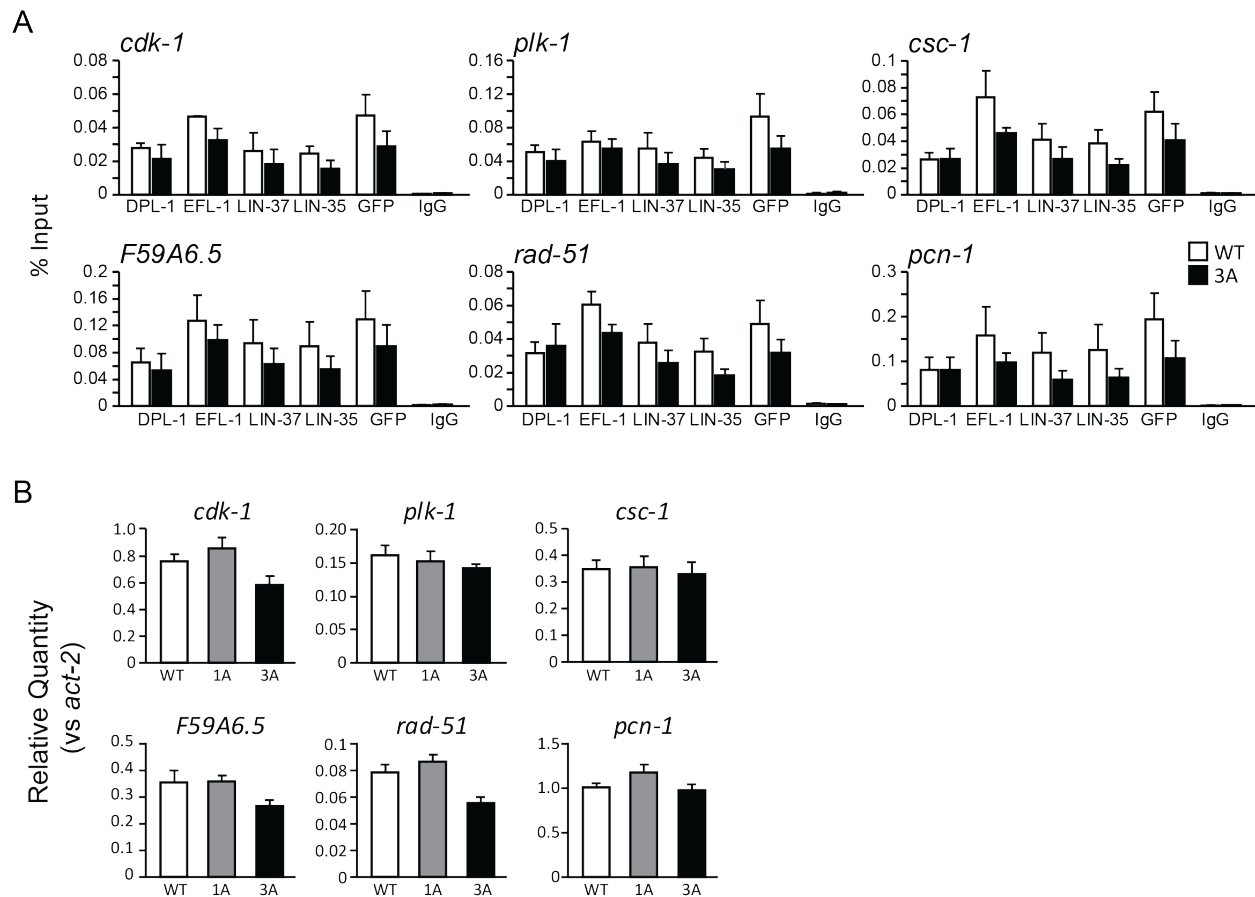

**Figure S3**

(A) ChIP-qPCR of 5 DREAM subunits DPL-1, EFL-1, LIN-37, LIN-35, and LIN-52 (via GFP tag) from *lin-52(WT)* (white) and *lin-52(3A)* (black) late embryo extracts at 6 DREAM target genes. IgG was used as a negative control. Signals are presented as percentage of Input DNA. Error bars indicate standard error of the mean.

(B) RT-qPCR analysis comparing transcript levels of the 6 DREAM target genes in *lin-52(WT)* (white) *lin-52(1A)* (grey), and *lin-52(3A)* (black) late embryos. Expression values from 2 independent experiments each consisting of 4 biological replicates were averaged and are presented as the relative quantity (Rq) compared to *act-2*. Error bars indicate standard error of the mean

**Table S1**

| Name                     | Sequence                                                       | Notes                                                                          |
|--------------------------|----------------------------------------------------------------|--------------------------------------------------------------------------------|
| <b>Cloning Primers</b>   |                                                                |                                                                                |
| lin-52 gRNA 5' F         | GTCGTATCCAATAAATCCTAGGTTTTAGAG<br>CTAGAAATAGCAAGTTA            | For pPDG14                                                                     |
| lin-52 gRNA 5' R         | CTAGGATTTATTGGATACGACAAACATTTAG<br>ATTTGCAATTCAATTATATAG       | For pPDG14                                                                     |
| lin-52 gRNA 3' F         | GAAGCCAGTGAATTGAATAGGTTTTAGAGC<br>TAGAAATAGCAAGTTA             | For pPDG18                                                                     |
| lin-52 gRNA 3' R         | CTATTC AATTC ACTGGCTTCAAACATTTAGA<br>TTTGCAATTCAATTATATAG      | For pPDG18                                                                     |
| lin-52_primer1_RFP       | GTCACGACGTTGTAACGACGGCCAGTC<br>GCATTCGAGCAAACCGGAGGA           | For pPDG13                                                                     |
| lin-52_primer2_RFP_Nterm | CTTGATGAGCTCCTCTCCCTTGGAGACCAT<br>TTTTTTCCTGAAATTACCGCTATATGTC | For pPDG13                                                                     |
| lin-52_primer3           | CGTGATTACAAGGATGACGATGACAAGAGA<br>ATTGAATAGTGGTCTATCAAAAATAATG | For pPDG13 and<br>pPDG17                                                       |
| lin-52_primer4_N-term    | TCACACAGGAAACAGCTATGACCATGTTAT<br>CACCTTGGGTACTTGCTGGAT        | For pPDG13                                                                     |
| lin-52_primer1_GFP       | ACGTTGTAACGACGCGCCAGTCGCCGGC<br>ACATTCGAGCAAACCGGAGGA          | For pPDG17                                                                     |
| lin-52_primer2_C-term    | CATCGATGCTCCTGAGGCTCCCGATGCTCC<br>CTGGCTCCTGCTGTTTCTTC         | For pPDG17                                                                     |
| lin-52_primer4_C-term    | GGAAACAGCTATGACCATGTTATCGATTTC<br>CACCTTGGGTACTTGCTGGAT        | For pPDG17                                                                     |
| sgRNA SDM R              | CAAGACATCTCGCAATAGG                                            | Reverse primer for<br>Q5 targeted<br>mutagenesis, see<br>Dickinson et al, 2013 |
| tagRFP-sgRNA SDM 5' F    | TGGCTTCCCTCTCCCTCGGGTTTTAGAGC<br>TAGAAATAGCAAGT                | For pPDG21                                                                     |
| tagRFP-sgRNA SDM 3' F    | TGTGTCCGAGCTTGGATGGGGTTTTAGAGC<br>TAGAAATAGCAAGT               | For pPDG22                                                                     |
| lin-52 LxCxE sgRNA SDM F | ACTTCTTCTGGCATTGTTTGTGTTTAGAGCT<br>AGAAATAGCAAGT               | For pPDG59                                                                     |
| <b>ChIP-qPCR Primers</b> |                                                                |                                                                                |
| set-21 Pro F             | ACGACGGGCCCAAAGTAAA                                            |                                                                                |
| set-21 Pro R             | TGTTGTTTCGTTTTCGCAATTT                                         |                                                                                |
| mis-12 Pro F             | TTCCCGACAATTCGCTCTCC                                           |                                                                                |
| mis-12 Pro R             | CGTGTATGCACACCTCACCT                                           |                                                                                |
| polh-1 Pro F             | TCAATGTTTGAAACCCCGCC                                           |                                                                                |
| polh-1 Pro R             | ATACTCAGCCAAGCAGCCAA                                           |                                                                                |
| air-1 Pro F              | ATTCGCAACGTGTCAGCAAC                                           |                                                                                |
| air-1 Pro R              | ATGAATTTTGCTTGGCGGGT                                           |                                                                                |
| cdk-1 Pro F              | ACAATCCTTCTCAGCGCGT                                            |                                                                                |
| cdk-1 Pro R              | CGATAGAAAAGGCGTAAGCGTG                                         |                                                                                |
| plk-1 Pro F              | CGCTGTTTTGTTTAGCACCT                                           |                                                                                |
| plk-1 Pro R              | CAAGAGGCGAGCTGGAAACT                                           |                                                                                |
| csc-1 Pro F              | TTTCCTTCTTTTGCGCGTGG                                           |                                                                                |
| csc-1 Pro R              | CGGAGAAAATCGAATTTTGGAGG                                        |                                                                                |
| F59A6.5 Pro F            | GAAAACGGGTTCCGTATGCT                                           |                                                                                |
| F59A6.5 Pro R            | TCTCTTCCGCAAACCCG                                              |                                                                                |

|                       |                        |  |
|-----------------------|------------------------|--|
| rad-51 Pro F          | GCGCACTTGCTGTA CTCTTG  |  |
| rad-51 Pro R          | CCGTTCTATCGGTGCCTTT    |  |
| pcn-1 Pro F           | TGAACGGAGAAAGTGCGATGA  |  |
| pcn-1 Pro R           | GTTGCGCGTCAAATAAAATGCC |  |
| RT-qPCR primers       |                        |  |
| set-21 1359-1524 F    | AAATGTTGCGCGAACTGTCCG  |  |
| set-21 1359-1524 R    | GTCCGTGTACGTCTTTCCGT   |  |
| mis-12 370-515 F      | ATTCGACAGCTCCGCATCAA   |  |
| mis-12 370-515 R      | ATTCGTGTTGGGCTATCGGG   |  |
| polh-1 759-842 F      | TGTTTCGAGGATTTGGCGGAA  |  |
| polh-1 759-842 R      | TCCACTTCGAGCAGTTCACC   |  |
| air-1 594-740 F       | ACGCCATACATTGTGCGGTA   |  |
| air-1 594-740 R       | CCAGTTTGATTGGCGAACGG   |  |
| cdk-1 703-911 F       | TTCAGAGTTCTCGGCACACC   |  |
| cdk-1 703-911 R       | TTCGCGTTGAGACGAAGTGA   |  |
| plk-1 1050-1280 F     | GAACAATGCCGATCGTGAGC   |  |
| plk-1 1050-1280 R     | CCGATGCCATACTTGTCCGA   |  |
| csc-1 425-588 F       | TTCCGATTGCTCCATCTGGC   |  |
| csc-1 425-588 R       | CGAGAAGGCGATTTCTCTCGT  |  |
| F59A6.5 (1964-2136) F | GCCAGATTGATGCGAAGCAG   |  |
| F59A6.5 (1964-2136) R | TTGACGTCTTTTCTCCGCGA   |  |
| rad-51 (534-686) F    | CAATGCCACTTTTCGACCCG   |  |
| rad-51 (534-686) R    | TCGGACATCATTGCTCCTGC   |  |
| pcn-1 (151-386) F     | AAGTTGGAGGTCGGCCTTTT   |  |
| pcn-1 (151-386) R     | ATCCCGAGATGTTTCGCTGTC  |  |
